# Supplementary material
Source: PubMed Central journal article supplement (PMC521976)

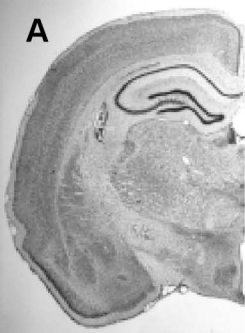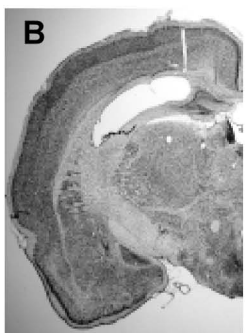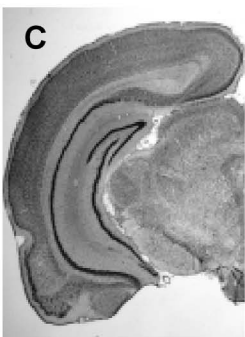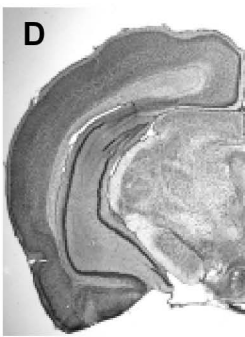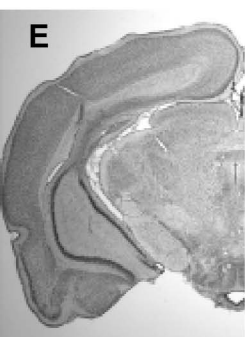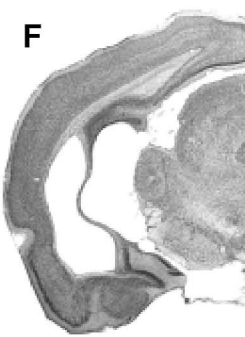

Supplement: pnas_101_40_14515__2.pdf [file pnas_101_40_14515__2.pdf]

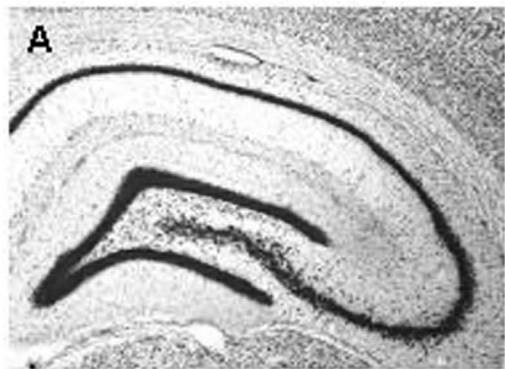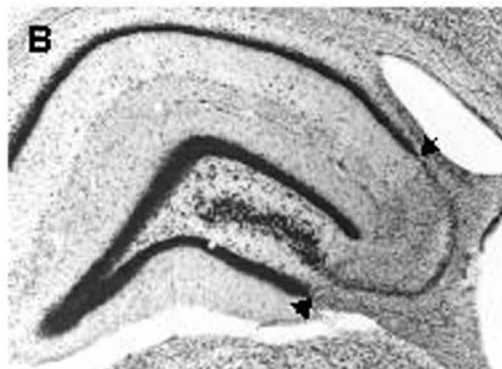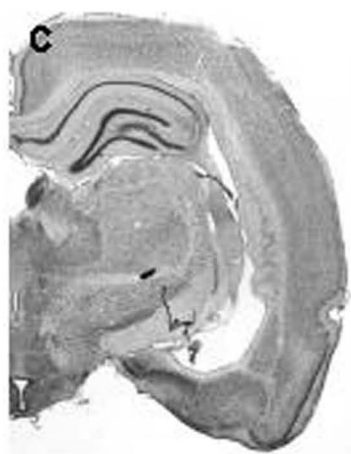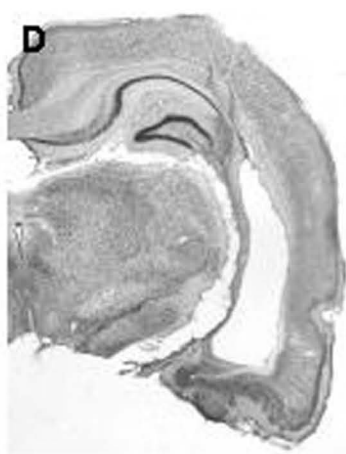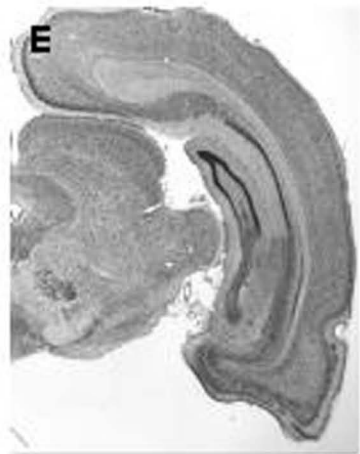

Supplement: pnas_101_40_14515__3.pdf [file pnas_101_40_14515__3.pdf]

Dorsal  
50-75%

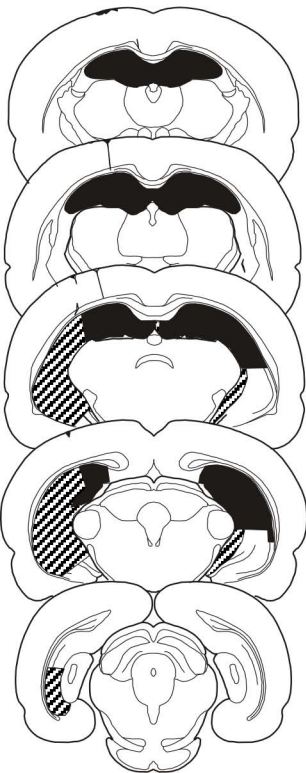

Dorsal  
75-100%

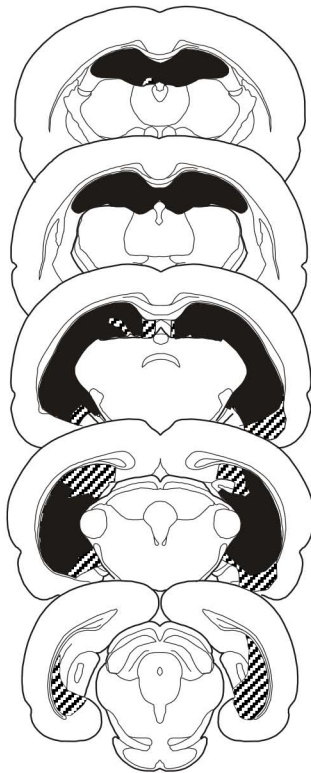

Ventral  
~50%

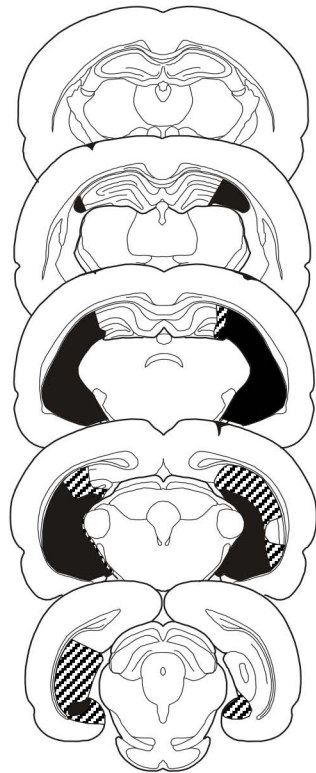

-2.80

-3.80

-4.80

-5.80

-6.80

Supplement: pnas_101_40_14515__4.pdf [file pnas_101_40_14515__4.pdf]
